# Supplementary material
Source: Research Square preprint supplement (doi:10.21203/rs.3.rs-8958698/v1)
Supplement: Supplementary file 1 [file 273cc83278ee7789d0806b94.xlsx]

## Sheet: Table S1
Table S1: Bioassay Checks
	Yeast isolates in Ae. albopictus oviposition sites	Experimental replicates	N. of parous ovaries	Starting Yeast concetration	Final Yeast concetration
	B. californica (PX992099)	cage 1	3	1x105	1,5x107
		cage 2	3	1x105	2x107
		cage 3	3	1x105	1,6x107
		cage 4	3	1x105	2,1x107
		cage 5	3	1x105	1,9x107
		cage 6	3	1x105	2,9x107
	W. Anomalus (PX992102)	cage 1	3	1x105	1x108
		cage 2	3	1x105	1x108
		cage 3	3	1x105	1x108
		cage 4	3	1x105	1,1x108
		cage 5	3	1x105	1,1x108
		cage 6	3	1x105	1x108
	M. pulcherrima (PX992113)	cage 1	3	1x105	1,4x108
		cage 2	3	1x105	2,6x108
		cage 3	3	1x105	1,9x108
		cage 4	3	1x105	1,7x108
		cage 5	3	1x105	1,1x108
		cage 6	3	1x105	1,8x108
	R. paludigena (PX992116)	cage 1	3	1x105	1,7x107
		cage 2	3	1x105	1,9x107
		cage 3	3	1x105	2x107
		cage 4	3	1x105	7,5x106
		cage 5	3	1x105	2x107
		cage 6	3	1x105	2,1x107

## Sheet: Table S2
Table S2: % OTUs at order level of Ascomycota
	Samples	Pleosporales	unclassified Ascomycota	Saccharomycetales	Phaffomycetales	Thelebolales	Dothideales	Lecanorales	Helotiales	Eurotiales	Lichenostigmatales	Cladosporiales	Xylariales	Mycosphaerellales	Other Ascomycota Order
Camerino	Ae. albopictus	0	12.545	3.382	29.089	0	0	0	0	2.388	0	52.596	0	0	0
	Ae. albopictus	1.003	5.034	13.445	6.823	0	0	0	0	42.836	0	21.3	0	2.156	7.403
	Cx.pipiens	20.104	2.453	6.968	27.422	0.547	22.964	0	10.893	1.78	0	3.224	0	0	3.645
	Cx.pipiens	9.634	24.317	4.956	33.441	0.973	21.26	0	0.88	0.834	0	3.381	0	0	0.324
	breeding water	26.146	6.199	31.896	9.793	0	0	0	0	0	0.449	23.001	0	2.516	0
Colbuccaro	Ae. albopictus	0.235	44.971	39.491	14.286	0	0	0	0.039	0.157	0	0.822	0	0	-0.001
	Ae. albopictus	0.379	35.82	49.768	11.167	0	0	0	0.169	0.337	0	2.36	0	0	0
	Cx.pipiens	1.741	41.231	44.673	5.12	0	0.166	0	0.124	0	0	6.488	0.166	0	0.291
	Cx.pipiens	1.088	62.115	11.36	17.039	0	0	1.148	0	0.242	0	4.411	0	2.598	-0.001
	breeding water	0	94.467	1.844	0.868	0.325	0.976	0	0.579	0	0	0.217	0.289	0	0.435
Petriolo	Ae. albopictus	1.76	0.203	2.123	93.003	0.18	1.096	0.058	0	0.163	0	0.711	0	0	0.703
	Ae. albopictus	0.864	0.138	0.304	97.675	0	0.213	0	0.041	0.053	0	0.542	0	0	0.17
	Cx.pipiens	8.361	16.107	26.68	16.967	0	6.967	0	2.213	3.893	0	16.025	0	0	2.787
	Cx.pipiens	12.366	14.387	11.967	30.696	0	13.813	1.959	5.116	0	0	0	0	0	9.696
	breeding water	5.239	43.46	5.557	3.674	3.164	9	0	1.037	0.093	10.235	16.285	0	1.147	1.109
Alano di Piave	Ae. koreicus	8.493	14.034	40.342	9.529	4.609	0.363	0	1.864	0	0	5.852	0.777	1.243	12.894
	Ae. koreicus	1.095	0.575	89.776	6.241	0	0	0	0.041	0.055	0	0.465	1.547	0	0.205
	breeding water	7.413	2.143	83.086	2.242	0.126	0.155	0	0.098	0.506	0	0.513	0.028	0	3.69
Pedavena	Ae. koreicus	35.61	6.829	26.179	16.26	0	0	0.813	2.764	0	0	11.057	0	0	0.488
	Ae. koreicus	2.943	0.453	80.023	9.394	1.188	0	0	0.849	1.188	0	3.339	0	0	0.623
	breeding water	1.485	1.203	93.832	2.457	0	0.128	0	0.154	0	0	0.435	0	0.051	0.255
Table S2: % OTUs at order level of Basidiomycota
Collectio site	Samples	Cystofilobasidiales	Auriculariales	Tremellales	Polyporales	Agaricales	Trechisporales	Pucciniales	Filobasidiales	Cantharellales	Buckleyzymales	Russulales	Corticiales	Hymenochaetales	Malasseziales	Sporidiobolales	Entylomatales	Wallemiales	Other Basibiomycota Orders
Camerino	Ae. albopictus	0	0	0	12.439	11.166	0	35.7	0	0	0	0	0	0	40.695	0	0	0	0
	Ae. albopictus	0	0	0	1.606	0.242	0	0.263	0.275	0.159	0	0	0	0	4.082	0.181	0	93.185	0.007
	Cx. pipiens	0	0	36.594	6.522	15.217	3.623	11.775	0	0	0	2.899	0	0	20.652	0	0	2.717	0.001
	Cx. pipiens	0	0	2.465	14.789	0	0	6.69	0	0	0	28.873	1.761	0	32.394	2.113	0	10.915	0
	breeding water	0	0	0	1.266	0	0	0	0	0	0	1.477	0	0	95.71	0	0	1.406	0
Colbuccaro	Ae. albopictus	0	2.768	5.351	4.244	0	0	0	38.192	0	0	0	0	0	13.1	35.609	0	0	0.736
	Ae. albopictus	0	0	0.767	1.023	3.836	0	0	65.729	0	0	0	0	0	7.161	21.483	0	0	0.001
	Cx. pipiens	0	0	2.799	0.778	0	0	1.089	60.964	0	0	0	0	0	23.173	11.198	0	0	-0.001
	Cx. pipiens	0	0	0	1.364	0	0	0	78.182	0	0	0	0	0	8.409	12.045	0	0	-1.42109e-14
	breeding water	13.095	0	0	0	0	0	0	25	0	0	0	0	0	4.762	44.048	0	13.095	0
Petriolo	Ae. albopictus	0	0	32.192	13.699	5.479	0	0	15.753	0	0	0	0	0	24.315	0	0	0	8.562
	Ae. albopictus	0	0	0	0	0	0	17.167	0	8.667	13.5	11.167	0	0	49.5	0	0	0	-0.001
	Cx. pipiens	0	0	0	0	0	0	0	3.831	0	0	0	0	10.282	52.218	7.258	0	26.411	0
	Cx. pipiens	0	0	55.798	0	0	0	0	0	0	0	0	5.151	0	31.311	7.74	0	0	1.42109e-14
	breeding water	0	1.385	6.721	7.734	0	0	0	0	0	1.114	2.533	0.507	0	63.965	7.058	0	3.647	5.336
Alano di Piave	Ae.koreicus	22.619	0	5.952	0	15.476	0	0	14.286	0	0	0	0	0	19.048	22.619	0	0	0
	Ae.koreicus	0	0	18.182	18.182	6.494	0	23.377	0	0	0	0	0	0	25.974	0	7.792	0	-0.001
	breeding water	0	0	19.219	0	9.309	0	0	0	0	0	0	0	0	21.922	7.808	0	11.712	30
Pedavena	Ae.koreicus	0	0	0	26.531	0	0	0	8.163	0	0	0	0	0	10.204	0	0	55.102	0
	Ae.koreicus	0	0	7.5	5	0	0	0	0	0	0	0	0	12.5	37.5	0	0	37.5	0
	breeding water	0	0	7.547	0	0	0	0	0	0	0	0	0	0	67.925	0	0	24.528	0
Table S2: % OTUs at order level of Other Phyla
Collection Site	Samples	Incertae_sedis;o__Fungi_ord_Incertae_sedis	Rozellomycota;o__Rozellomycota_ord_Incertae_sedis	Rozellomycota;c__Rozellomycotina_cls_Incertae_sedis;o__GS05	Rozellomycota;c__Rozellomycotina_cls_Incertae_sedis;o__GS11
Camerino	Ae. albopictus	0	100	0	0
	Ae. albopictus	0	100	0	0
	Cx. pipiens	24.452	75.548	0	0
	Cx. pipiens	0	100	0	0
	breeding water	0	0	0	0
Colbuccaro	Ae. albopictus	0.314	99.686	0	0
	Ae. albopictus	0	100	0	0
	Cx. pipiens	2.957	97.043	0	0
	Cx. pipiens	0	100	0	0
	breeding water	0	100	0	0
Petriolo	Ae. albopictus	20.345	56.622	23.033	0
	Ae. albopictus	10.557	57.869	31.574	0
	Cx. pipiens	25.91	71.709	2.381	0
	Cx. pipiens	21.47	70.758	2.49	5.282
	breeding water	13.707	81.138	4.857	0.298
Alano di Piave	Ae.koreicus	100	0	0	0
	Ae.koreicus	78.652	21.348	0	0
	breeding water	27.273	72.727	0	0
Pedavena	Ae.koreicus	100	0	0	0
	Ae.koreicus	65.217	34.783	0	0
	breeding water	100	0	0	0

## Sheet: Table S3
Tabella S3: % OTUs at genus/family level
	Samples	Itersonilia	Metschnikowia	Pleosporales	Hazslinszkyomyces	Saccharomyces	Thelebolus	Aureobasidium	Pseudeurotiaceae	Mucor	Rozellomycotina	Steccherinum	Phanerochaete	Phialocephala	Vishniacozyma	Tranzschelia	Fuscoporia	Naganishia	Ascosphaera	Chaetosphaeronema	Parastagonospora	Candida	Blumeria	Botrytis	Sarcogyne	Penicillium	Debaryomycetaceae	Kurtzmaniella	Meyerozyma	Schwanniomyces	Stemphylium	Neoascochyta	Aspergillus	Paraphoma	Sphaerellopsis	Phaeococcomyces	Peniophora	Malassezia	Sporobolomyces	Rhodotorula	Wallemia	Wickerhamomyces	Vuilleminia	Catenophlyctis	Phlegmacium	Rhizophydiaceae	Cladosporium	Alternaria	Pleosporaceae
Camerino	Ae. albopictus	0	0	0	0	0	0	0	0	0	0	0	2	0	0	7	0	0	0	0	0	3	0	0	0	2	0	0	0	0	0	0	0	0	0	0	0	8	0	0	0	27	0	0	2	0	49	0	0
	Ae. albopictus	0	0	0	0	0	0	0	0	0	0	0	0	0	0	0	0	0	0	0	0	0	0	0	0	4	0	1	1	0	0	0	4	0	0	0	0	3	0	0	75	1	0	0	0	0	4	0	0
	Cx. pipiens	0	0	0	0	0	0	22	1	0	0	0	0	0	2	1	0	0	0	0	0	7	0	10	0	0	0	0	0	0	12	0	2	0	0	0	0	2	0	0	0	27	0	0	0	0	3	6	2
	Cx. pipiens	0	0	0	0	0	0	24	1	0	0	2	0	0	0	1	0	0	0	0	0	5	0	0	0	1	0	0	0	0	0	0	0	0	2	0	4	5	0	0	2	38	0	0	0	0	4	9	0
	breeding water	0	14	0	0	0	0	0	0	0	0	0	0	0	0	0	0	0	0	0	0	0	0	0	0	0	0	1	0	0	0	0	0	0	0	0	1	55	0	0	1	4	0	0	0	0	10	12	0
Colbuccaro	Ae. albopictus	0	0	0	0	0	0	0	0	0	0	0	0	0	0	0	0	6	0	0	0	1	0	0	0	0	32	27	0	0	0	0	0	0	0	0	0	2	0	6	0	22	0	0	0	0	1	0	0
	Ae. albopictus	0	0	0	0	0	0	0	0	0	0	0	0	0	0	0	0	13	0	0	0	3	0	0	0	0	59	0	0	0	0	0	0	0	0	0	0	1	0	4	0	14	0	0	0	0	3	0	0
	Cx. pipiens	0	0	0	0	0	0	0	0	0	0	0	0	0	1	0	0	11	0	0	0	43	0	0	0	0	17	1	0	0	0	0	0	0	0	0	0	4	0	2	0	7	0	0	0	0	9	1	1
	Cx. pipiens	0	0	0	0	0	0	0	0	0	0	0	0	0	0	0	0	32	0	0	0	3	0	0	0	0	14	1	0	0	0	1	0	0	0	0	0	3	0	5	0	26	0	0	0	0	7	0	0
	breeding water	5	1	0	0	0	0	11	4	0	0	0	0	0	0	0	0	9	0	0	0	9	7	0	5	0	11	0	0	0	0	0	0	0	0	0	0	2	0	16	5	10	0	0	0	0	3	0	0
Petriolo	Ae. albopictus	0	0	1	0	0	0	1	0	0	0	0	0	0	0	0	0	0	0	0	0	2	0	0	0	0	0	0	0	0	0	0	0	0	0	0	0	0	0	0	0	93	0	0	0	0	1	0	0
	Ae. albopictus	0	0	0	0	0	0	0	0	0	0	0	0	0	0	0	0	0	0	0	0	0	0	0	0	0	0	0	0	0	0	0	0	0	0	0	0	0	0	0	0	97	0	0	0	0	1	0	0
	Cx. pipiens	0	4	2	0	0	0	7	0	0	1	0	0	0	0	0	2	0	0	0	0	13	0	2	0	1	0	0	0	9	0	1	2	0	0	0	0	10	1	0	5	16	0	0	0	0	15	1	3
	Cx. pipiens	0	0	0	6	0	0	10	0	2	7	0	0	2	18	0	0	0	2	0	0	8	0	0	0	0	0	0	0	0	0	0	0	0	0	0	0	10	1	1	0	22	2	0	0	0	0	0	3
	breeding water	0	0	0	0	0	0	11	4	0	1	0	0	0	0	0	0	0	0	3	0	6	0	0	0	0	0	1	0	0	0	0	0	0	0	13	0	14	2	0	1	5	0	2	0	3	21	0	2
Alano di Piave	Ae. koreicus	1	0	0	0	0	6	0	0	0	0	0	0	0	0	0	0	0	0	0	0	0	0	2	0	0	0	48	1	0	0	0	0	4	0	0	0	1	1	0	0	12	0	0	0	0	8	1	6
	Ae. koreicus	0	0	0	0	0	0	0	0	0	0	0	0	0	0	0	0	0	0	0	0	0	0	0	0	0	0	85	4	0	0	0	0	0	0	0	0	0	0	0	0	6	0	0	0	0	0	0	1
	breeding water	0	0	0	0	0	0	0	0	0	0	0	0	0	0	0	0	0	0	0	0	0	0	0	0	0	0	80	3	0	0	0	0	6	0	0	0	1	0	0	0	2	0	0	0	0	1	0	0
Pedavena	Ae. koreicus	0	2	0	0	6	0	0	0	0	0	0	0	0	0	0	0	0	0	0	10	0	0	2	0	0	0	17	1	0	0	0	0	0	0	0	0	1	0	0	4	16	0	0	0	0	11	10	15
	Ae. koreicus	0	0	0	0	0	0	0	0	0	0	0	0	0	0	0	0	0	0	0	0	0	0	1	0	0	0	72	6	0	1	0	1	0	0	0	0	1	0	0	1	9	0	0	0	0	3	0	1
	breeding water	0	0	0	0	1	0	0	0	0	0	0	0	0	0	0	0	0	0	0	0	0	0	0	0	0	0	89	4	0	0	0	0	0	0	0	0	1	0	0	0	2	0	0	0	0	0	0	0
[truncated: 3 more columns]

## Sheet: Table S4
Tabella S4: List of volatile compounds obtained from the HS-SPME-GC-MS analysis of the indicated yeast strains.
	N.	Volatile	RT	LRI	LRI	Barnettozyma californica (PX992099)		Wickerhamomyces anomalus (PX992102)		Candida parapsilosis (PX992103)		Metschnikowia pulcherrima (PX992113)		Schwanniomyces vanrijiae (PX992115)		Rhodotorula paludigena (PX992116)		Sporobolomyces roseus (PX992117)
		compound	(min)	(exp)	(lit)
						Average± SD	Relative peak area %	Average ± SD	Relative peak area %	Average ± SD	Relative peak area %	Average	Relative peak area %	Average± SD	Relative peak area %	Average± SD	Relative peak area %	Average± SD	Relative peak area %
	1	Ethyl Acetate	7981	885	890	3765.87 ± 418.01	26.22	5560 ± 632.22	25.15	1757.37 ± 201.3	13.53	25.49 ± 2.74	0.37	-	-	-	-	-	-
	2	Ethanol	9798	935	940	-	-	3050.76 ± 345.23	13.80	1839,74 ± 194.2	14.17	2395.7 ± 27.32	34.64	3266.63 ± 327.89	39.66	-	-	-	-
	3	Ethyl propanoate	10549	957	951	103.51 ± 11.43	0.72	27.00 ± 5.54	0.12	-	-	-	-	-	-	-	-	-	-
	4	n-Propyl acetate	11239	978	977	121.46 ± 13.65	0.85	42.00 ± 4.44	0.19	10.00 ± 1,22	0.08	-	-	-	-	-	-	-	-
	5	Isobutyl Acetate	12921	1016	1019	31.10 ± 3.43	0.22	-	-	10.00 ± 1.43	0.08	-	-	-	-	-	-	-	-
	6	Ethyl butanoate	14084	1037	1036	16.08 ± 1.59	0.11	59.27 ± 6.20	0.27	-	-	-	-	-	-	-	-	-	-
	7	1-Propanol	14362	1041	1040	12.25 ± 13.65	0.09	-	-	0.97 ± 1.22	0.01	8.81 ± 0.90	0.13	13.89 ± 1.53	0.17	-	-	-	-
	8	Methyl thiolacetate	14637	1046	1050	-	-	-	-	-	-	11.38 ± 1.54	0.16	-	-	-	-	-	-
	9	Butyl acetate	15917	1069	1059	104.28 ± 11.65	0.73	76.01 ± 8.23	0.34	30.00 ± 4.3	0.23	-	-	-	-	-	-	-	-
	10	2-Methyl-1-propanol	17173	1091	1094	123.82 ± 13.78	0.86	2.92 ± 0.33	< 0.01	7.92 ± 0.98	0.06	173 ± 18.21	2.50	192.37 ± 22.21	2.34	-	-	-	-
	11	2-Methyl-2-pentanol	17747	1101	1101	-	-	2368.27 ± 25.56	10.71	0.53 ± 0.06	< 0.01	17.48 ± 1.23	0.25	-	-	-	-	5.13 ± 0.65	0.61
	12	3-Methylbutyl acetate	18554	1116	1126	2914.70 ± 318.76	20.30	-	-	1577.29 ± 167.2	12.14	-	-	18.50 ± 1.91	0.22	-	-	-	-
	13	3-Methylbutyl propanoate	22377	1188	1188	7.64 ± 0.87	0.05	-	-	-	-	-	-	-	-	-	-	-	-
	14	3-Methyl-3-butenyl acetate	22713	1195	1190	8.03 ± 0.98	0.06	-	-	-	-	-	-	-	-	-	-	-	-
	15	2-Methyl-1-butanol	23539	1210	1208	333.58 ± 40.54	2.32	-	-	32.26 ± 38	0.25	489.25 ± 51.43	7.07	501.28 ± 5.98	6.09	-	-	1.12 ± 0,22	0.13
	16	3-Methyl-1-butanol	23569	1211	1211	1665.21 ± 180.76	11.60	4980.09 ± 51.46	22.53	4200,71 ± 456	32.34	2135.89 ± 226.76	30.88	2728.39 ± 292.33	33.12	328.31 ± 38.54	15.06	239.84 ± 31.54	28.49
	17	3-Octanone	26001	1256	1240	-	-	-	-	0.58 ± 0,064	-	5.24 ± 0.6	0.08	-	-	-	-	-	-
	18	Methylpyrazine	26650	1268	1263	-	-	-	-	0.16 ± 0.02	-	1.17 ± 0.22	0.02	10.40 ± 1.23	0.13	3.041 ± 0.45	0.14	12.41 ± 0.21	1.47
	19	2-Octanone	27711	1286	1285	-	-	-	-	1.01 ± 0,13	0.01	6.76 ± 0.77	0.10	-	-	-	-	-	-
	20	Acetoin	27654	1287	1287	-	-	58.98 ± 6.07	0.27	6.18 ± 0.59	0.05	14.00 ± 1.43	0.20	29.78 ± 3.01	0.36	191.76 ± 21.43	8.80	-	-
	21	1-Hydroxy-2-propanone	28448	1301	1301	-	-	-	-	-	-	-	-	8.82 ± 0.98	0.11	-	-	5.10 ± 0.65	0.61
	22	1,2,3-Trimethylbenzene	30341	1333	1331	10.94 ± 12.3	0.08	-	-	-	-	-	-	16.16 ± 1.67	0.20	15.99 ± 17.55	0.73	9.23 ± 11.21	1.10
	23	4-Methyl-2-heptanol	31952	1361	1369	-	-	-	-	-	-	3.71 ± 0.43	0.05	2.43 ± 0.32	0.03	2.02 ± 0.24	0.09	2.76 ± 0.32	0.33
	24	1-Ethyl-2,3-dimethylbenzene,	32128	1364	1362	7.71 ± 0.87	0.05	-	-	-	-	3.49 ± 0.38	0.05	14.17 ± 1.48	0.17	11.62 ± 1.43	0.53	10.56 ± 1.32	1.25
	25	Trimethylpyrazine	34282	1402	1405	-	-	0.62 ± 0.076	< 0.00	0.32 ± 0.045	<0.01	-	-	21.27 ± 2.22	0.26	-	-	6.34 ± 0.78	0.75
	26	1,2,4,5-Tetramethylbenzene	35661	1430	1435	48.20 ± 5.65	0.34	-	-	-	-	-	-	77.59 ±.7.89	0.94	55.84 ± 6.11	2.56	50.20 ± 6.11	5.96
	27	3-Ethyl-2,5-dimethylpyrazine	36398	1446	1444	-	-	2.84 ± 0.31	0.01	0.21 ± 0.032	<0.01	-	-	6.47 ± 0.67	0.08	-	-	-	-
	28	Acetic acid	36624	1451	1449	44.32 ± 5.65	0.31	-	-	-	-	-	-	-	-	350.90 ± 4.01	16.10	-	-
	29	2-Ethyl-3,5-dimethylpyrazine,	37262	1461	1462	-	-	-	-	0.13 ± 0.023	<0.01	1.38 ± 0.16	0.02	2.01 ± 0.23	0.02	-	-	4.59 ± 0.54	0.55
	30	1,2,3,4-Tetramethylbenzene	37262	1486	1464	15.00 ± 2.01	0.10	-	-	-	-	5.18 ± 0.65	0.07	18.71 ± 1.98	0.23	12.17 ± 1.45	0.56	10.94 ± 1.32	1.30
	31	2,4-dimethyl- (2S,4R)-(-)-1-heptanol	40255	1574	1570	-	-	-	-	1.33 ± 0.15	0.01	9.27 ± 1.09	0.13	2.76 ± 0.33	0.03	-	-	-	-
	32	2-Methylpropanoic acid	41229	1574	1574	13.88 ± 1.54	0.10	132.76 ± 14.78	0.60	57.42 ± 6.2	0.44	13.7 ± 1.21	0.20	14.61 ± 1.34	0.18	17.19 ± 1.93	0.79	7.04 ± 0.89	0.84
	33	2,2-Dimethylpropanoic acid	41478	1583	1579	-	-	-	-	-	-	-	-	-	-	5.32 ± 0.65	0.24	-	-
	34	3-(Methylthio)propyl acetate	42346	1623	1627	36.06 ± 3.43	0.25	-	-	-	-	-	-	-	-	-	-	-	-
	35	Butanoic acid	42385	1626	1630	64.77 ± 7.01	0.45	133.60 ± 13.89	0.60	45.80 ± 4.7	0.35	83.46 ± 9.21	1.21	99.33 ± 1.08	1.21	123.22 ± 14.43	5.65	-	-
	36	Benzeneacetaldehyde	42548	1637	1646	93.84 ± 10.32	0.65	-	-	2.20 ± 0.32	0.02	21.08 ± 2.32	0.30	187.63 ± 19.77	2.28	-	-	13.71 ± 1.54	1.63
	37	Acetophenone	42753	1650	1652	43.47 ± 5.33	0.30	0.73 ± 0.067	0.00	4.19 ± 0.54	0.03	36.64 ± 3.98	0.53	30.60 ± 4.89	0.37	25.74 ± 3.33	1.18	24.28 ± 3.12	2.89
	38	2-Furanmethanol	42869	1658	1661	13.65 ± 1.76	0.10	-	-	1.09 ± 0.013	0.01	15.82 ± 1.78	0.23	11.30 ± 1.54	0.14	11.56 ± 1.32	0.53	6.02 ± 0,76	0.72
	39	3-Methylbutanoic acid	43159	1677	1667	16.68 ± 1.98	0.12	-	-	43.30 ± 5.01	0.33	21.34 ± 2.98	0.31	63.38 ± 7.08	0.77	189.40 ± 22.32	8.69	-	-
	40	3-(Methylthio)-1-propanol	43801	1721	1719	43.47 ± 4.65	0.30	6.92 ± 0.75	0.03	3.00 ± 0.32	0.02	19.98 ± 2.24	0.29	-	-	-	-	-	-
	41	Methyl salicylate	44658	1782	1778	358.35 ± 39.43	2.50	29.13 ± 2.78	0.13	5.45 ± 0.57	0.04	-	-	304.65 ± 31.44	3.70	169.19 ± 20.21	7.76	204.00 ± 25.04	24.23
	42	4-Methylpentanoic acid	44940	1802	1803	-	-	-	-	-	-	5.11 ± 0.67	0.07	5.49 ± 0.65	0.07	6.17 ± 0.98	0.28	-	-
	43	2-Phenylethylacetate	45078	1815	1813	657.96 ± 71.54	4.58	1683.66 ± 18.58	7.62	579.88 ± 61.21	4.46	-	-	-	-	-	-	-	-
	44	Hexanoic acid	45381	1843	1846	25.47 ± 3.01	0.18	77.80 ± 8.78	0.35	25.27 ± 2.76	0.19	16.50 ± 1.98	0.24	-	-	5.72 ± 0.87	0.26	-	-
	45	p-Isopropylacetophenone	45564	1860	na	29.23 ± 3.33	0.20	-	-	-	-	-	-	28.61 ± 2.9	0.35	24.57 ± 3.12	1.13	21.87 ± 2.98	2.60
	46	Benzyl alcohol	45700	1872	1868	18.25 ± 1.76	0.13	-	-	1.07 ± 0.14	0.01	13.58 ± 1.79	0.-20	8.98 ± 9.78	0.11	22.19 ± 3.22	1.02	-	-
	47	Phenylethyl alcohol	46068	1909	1920	3283.68 ± 409.54	22.87	3763.73 ± 39.44	17.03	2675.58 ± 29.32	20.60	1230.08 ± 134.55	17.79	324.54 ± 34.77	3.94	14.63 ± 1.78	0.67	-	-
	48	p-Methylbenzyl alcohol	46496	1962	1967	13.25 ± 1.65	0.09	-	-	8.03 ± 2.1	0.06	131.26 ± 15.66	1.90	26.24 ± 3.01	0.32	-	-	-	-
	49	Nonanoic acid	48109	2175	2175	241.20 ± 30.65	1.68	3.20 ± 0.42	0.01	58.91 ± 6.1	0.45	-	-	-	-	-	-	-	-
	50	2,4-Di-tert-butylphenol	49135	2274	2276	67.44 ± 8.89	0.47	45.90 ± 6.44	0.21	-	-	-	-	167.74 ± 17.89	2.04	586.98 ± 67.34	26.93	201.27 ± 25.55	23.91
